# Supplementary material for: Telemedicine Visits in US Skilled Nursing Facilities
Source: PubMed Central journal article supplement (PMC10439478; doi:10.1001/jamanetworkopen.2023.29895), 2023-08-18
Supplement: jamanetwopen-e2329895-s001.pdf [file jamanetwopen-e2329895-s001.pdf]

## Supplemental Online Content

Ulyte A, Mehrotra A, Wilcock AD, SteelFisher GK, Grabowski DC, Barnett ML. Telemedicine visits in US skilled nursing facilities. *JAMA Netw Open*. 2023;6(8):e2329895. doi:10.1001/jamanetworkopen.2023.29895

**eTable 1.** Attrition of SNFs and their residents included in the study

**eAppendix 1.** List of included clinician specialties

**eTable 2.** List of place-of-service, procedure, and modifier codes to identify telemedicine visits

**eTable 3.** Characteristics of long- and short-term care residents in SNFs in 2020

**eFigure 1.** Telemedicine use for outpatient visits in SNF residents across US states in 2019-2022

**eFigure 2.** Count of SNF and outpatient visits delivered by telemedicine for short- and long-term SNF residents in 2019-2022

**eTable 4.** Top principal diagnoses groups in telemedicine visits in 2020-2021

**eTable 5.** Adjusted odds ratios of characteristics of SNFs in the top quartile by telemedicine use for SNF visits in 2020 and 2021

**eTable 6.** Characteristics of SNF visit providing clinicians in the top decile by telemedicine use in 2020-2021

**eTable 7.** Characteristics of patients who received at least one telemedicine visit during their SNF stay in 2020-2021

**eFigure 3.** Proportion of visits delivered by telemedicine in four examined clinical care scenarios for long-term care residents in high- and low- telemedicine use SNFs in 2018-2021

**eAppendix 2.** Testing of parallel trends for the outcomes before telemedicine expansion

**eAppendix 3.** Difference-in-differences in visit counts in 2018-2019 vs 2020-2021 in high vs low telemedicine adopting SNFs

**eAppendix 4.** Difference-in-differences models with a separate term for 2020 and 2021

This supplemental material has been provided by the authors to give readers additional information about their work.

**eTable 1.** Attrition of skilled nursing facilities and their residents included in the study

| <b>Population</b>                                                                                                                                        | <b>N of residents</b> | <b>N of facilities</b> |
|----------------------------------------------------------------------------------------------------------------------------------------------------------|-----------------------|------------------------|
| Beneficiaries with a SNF stay (Part A claim) or MDS record in 2018-2022 (through June), fully covered by Medicare Part A or Part B during their SNF stay | 6,661,788             | 18,067                 |
| Exclude stays in other locations than SNFs (with provider numbers starting not in 5000-6499)                                                             | 5,991,813             | 15,794                 |
| Exclude if not in one of the 50 US states or DC                                                                                                          | 5,990,984             | 15,774                 |
| <b>Difference-in-differences analysis</b>                                                                                                                |                       |                        |
| Long-term care residents in 2018-2021, with ≥60 days at a SNF within the calendar year                                                                   | 1,723,131             | 15,657                 |
| Exclude SNFs that had <10 SNF and <10 other resident visits in the periods before (2017-2019) or during (2020-2021) the pandemic                         | 1,715,375             | 15,061                 |
| Exclude residents and SNFs with missing characteristics                                                                                                  | 1,713,421             | 14,968                 |

SNF – skilled nursing facility.

**eAppendix 1.** List of included clinician specialties

| <b>CMS Provider Specialty code</b> | <b>Specialty</b>                                                   |
|------------------------------------|--------------------------------------------------------------------|
| 1                                  | General practice                                                   |
| 2                                  | General surgery                                                    |
| 3                                  | Allergy/immunology                                                 |
| 4                                  | Otolaryngology                                                     |
| 5                                  | Anesthesiology                                                     |
| 6                                  | Cardiology                                                         |
| 7                                  | Dermatology                                                        |
| 8                                  | Family practice                                                    |
| 9                                  | Interventional Pain Management                                     |
| 10                                 | Gastroenterology                                                   |
| 11                                 | Internal medicine                                                  |
| 12                                 | Osteopathic manipulative therapy                                   |
| 13                                 | Neurology                                                          |
| 14                                 | Neurosurgery                                                       |
| 16                                 | Obstetrics/gynecology                                              |
| 17                                 | Hospice and Palliative Care                                        |
| 18                                 | Ophthalmology                                                      |
| 19                                 | Oral surgery (dentists only)                                       |
| 20                                 | Orthopedic surgery                                                 |
| 21                                 | Cardiac Electrophysiology                                          |
| 23                                 | Sports medicine                                                    |
| 23                                 | Peripheral vascular disease, medical or surgical (osteopaths only) |
| 24                                 | Plastic and reconstructive surgery                                 |
| 25                                 | Physical medicine and rehabilitation                               |
| 26                                 | Psychiatry                                                         |
| 27                                 | Geriatric Psychiatry                                               |
| 28                                 | Colorectal surgery                                                 |
| 29                                 | Pulmonary disease                                                  |
| 33                                 | Thoracic surgery                                                   |
| 34                                 | Urology                                                            |
| 37                                 | Pediatric medicine                                                 |
| 38                                 | Geriatric medicine                                                 |
| 39                                 | Nephrology                                                         |
| 40                                 | Hand surgery                                                       |
| 42                                 | Certified nurse midwife                                            |
| 43                                 | CRNA                                                               |
| 44                                 | Infectious disease                                                 |
| 46                                 | Endocrinology                                                      |
| 48                                 | Podiatry                                                           |
| 50                                 | Nurse practitioner                                                 |
| 66                                 | Rheumatology                                                       |
| 72                                 | Pain Management                                                    |
| 76                                 | Peripheral vascular disease                                        |
| 77                                 | Vascular surgery                                                   |
| 78                                 | Cardiac surgery                                                    |
| 79                                 | Addiction medicine                                                 |
| 81                                 | Critical care (intensivists)                                       |
| 82                                 | Hematology                                                         |
| 83                                 | Hematology/oncology                                                |

- 84 Preventive medicine
  - 85 Maxillofacial surgery
  - 86 Neuropsychiatry
  - 89 Certified clinical nurse specialist
  - 90 Medical oncology
  - 91 Surgical oncology
  - 92 Radiation oncology
  - 93 Emergency medicine
  - 94 Interventional radiology
  - 97 Physician assistant
  - 98 Gynecologist/oncologist
  - 99 Unknown physician specialty
  - C0 Sleep medicine
  - C3 Interventional cardiology
  - C5 Dentist
  - C6 Hospitalist
  - C7 Advanced heart failure and transplant cardiology
  - C8 Medical toxicology
  - C9 Hematopoietic cell transplantation and cellular therapy
- 

CMS - The Centers for Medicare & Medicaid Services.

The full list of all CMS Provider Specialty codes is accessible at

[https://resdac.org/sites/datadocumentation.resdac.org/files/CMS\\_PRVDR\\_SPCLTY\\_TB\\_rev01242018\\_0.txt](https://resdac.org/sites/datadocumentation.resdac.org/files/CMS_PRVDR_SPCLTY_TB_rev01242018_0.txt)

**eTable 2.** List of place-of-service, procedure, and modifier codes to identify telemedicine visits

| <b>Category</b>                                   | <b>Codes</b>                                                                       |
|---------------------------------------------------|------------------------------------------------------------------------------------|
| Place of service                                  | 01, 02                                                                             |
| Healthcare Common Procedure Coding System (HCPCS) | G2025, G0406-8, G2010, G2012, G2061-3, G2250-2, 99421-3, 99441-3, 98970-2, 98966-8 |
| HCPCS modifier codes                              | GT, GQ, 95, G0, FQ, 93                                                             |

Any of the codes would suffice to flag a visit as telemedicine. For SNF visits that were selected based on Healthcare Common Procedure Coding System (HCPCS) codes, only place of service and HCPCS modifier codes could be used to identify telemedicine visits.

**eTable 3.** Characteristics of long- and short-term care residents in SNFs in 2020

|                                    | Long-term residents | Short-term residents |
|------------------------------------|---------------------|----------------------|
| N                                  | 1,078,644 (55.5%)   | 865,851 (44.5%)      |
| Female sex (%)                     | 674,074 (62.5%)     | 509,140 (58.8%)      |
| Age (%)                            |                     |                      |
| <65                                | 110,055 (10.2%)     | 67,348 (7.8%)        |
| 65-74                              | 223,086 (20.7%)     | 205,070 (23.7%)      |
| 75-84                              | 298,442 (27.7%)     | 290,712 (33.6%)      |
| ≥85                                | 447,061 (41.5%)     | 302,721 (35.0%)      |
| Race/ethnicity (%)                 |                     |                      |
| Black                              | 144,505 (13.4%)     | 84,932 (9.8%)        |
| White                              | 872,205 (80.9%)     | 734,157 (84.8%)      |
| Other                              | 61,934 (5.7%)       | 46,762 (5.4%)        |
| Dual eligible in 2019 (%)          | 795,401 (73.7%)     | 236,446 (27.3%)      |
| Reason for Medicare enrollment (%) |                     |                      |
| Old age                            | 753,200 (69.8%)     | 667,997 (77.2%)      |
| Disability or renal failure        | 325,444 (30.2%)     | 197,854 (22.9%)      |
| N of comorbidities (mean, SD)      | 11.4 (3.5)          | 11.5 (3.3)           |
| Dementia (%)                       | 398,013 (36.9%)     | 137,514 (15.9%)      |

SNF – skilled nursing facility.

Residents who had both short- and subsequent long-term care stays in 2020 are included in both groups. All residents staying at least one day at a SNF in 2020 are included. Other race/ethnicity includes Asian, Hispanic, North American native, other, and missing.

**eFigure 1.** Telemedicine use for outpatient visits in SNF residents across US states in 2019-2022

Telemedicine among outpatient visits 0-1% 1-5% 5-10% 10-15% 15-45%

2019

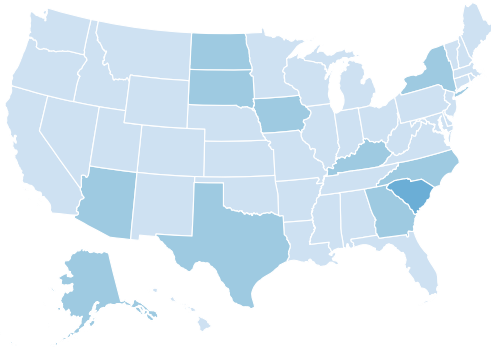

2020

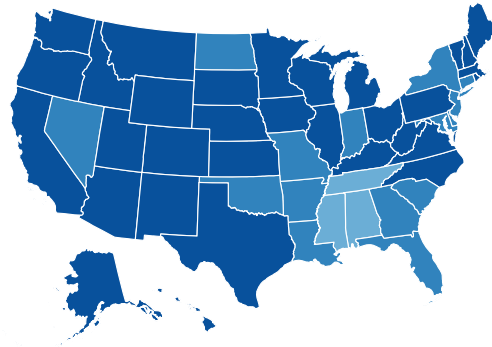

2021

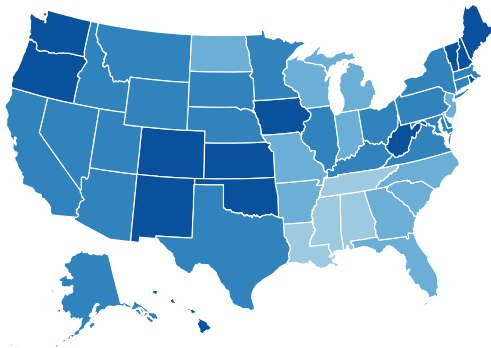

2022

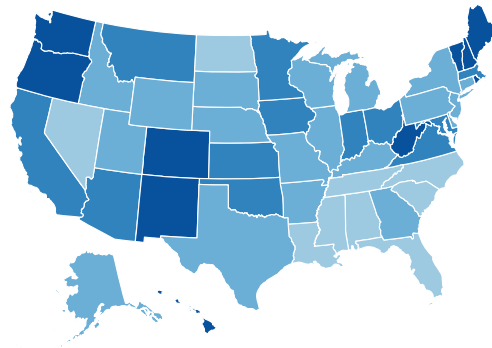

SNF – skilled nursing facility.

Outpatient visits capture visits with non-SNF affiliated primary and specialty care clinicians. Map for 2022 depicts visits in January-June 2022.

**eFigure 2.** Count of SNF and outpatient visits delivered by telemedicine for short- and long-term SNF residents in 2019-2022

SNF visits

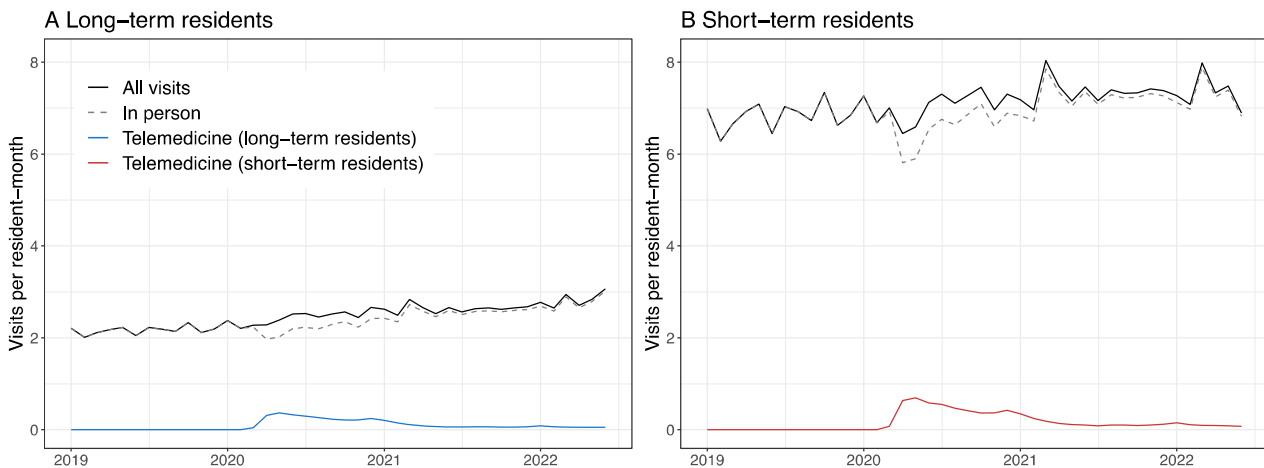

Outpatient visits

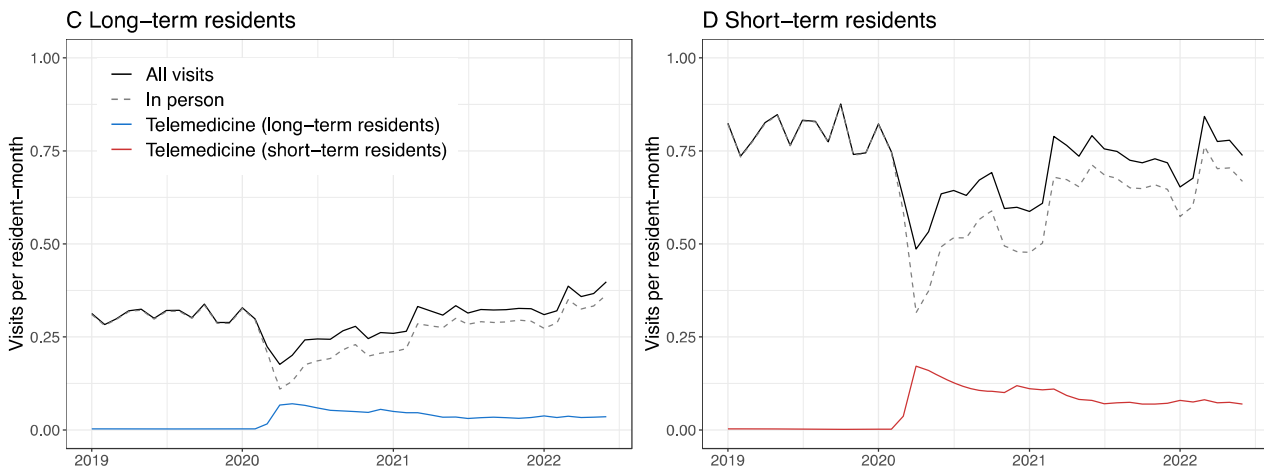

SNF visits are shown in top row (A and B) and outpatient visits in bottom row (C and D). Visits for long-term care residents are on the left (A and C) and visits for short-term stay residents on the right (B and D).



**eTable 4.** Top principal diagnoses groups in telemedicine visits in 2020-2021

| Short-term stays                    |      |       | Long-term care                                                     |      |       |
|-------------------------------------|------|-------|--------------------------------------------------------------------|------|-------|
| Diagnosis group                     | TM % | all % | Diagnosis group                                                    | TM % | all % |
| 1 COVID-19                          | 6.4  | 2.9   | Depressive disorders                                               | 8.2  | 4.6   |
| 2 Essential hypertension            | 4.8  | 5.7   | Neurocognitive disorders                                           | 7.9  | 6.3   |
| 3 Malaise and fatigue               | 3.2  | 3.7   | COVID-19                                                           | 6.2  | 2.8   |
| 4 Depressive disorders              | 3.1  | 1.7   | Essential hypertension                                             | 6.0  | 7.0   |
| 5 Pressure ulcer of skin            | 2.8  | 2.3   | Schizophrenia spectrum and other psychotic disorders               | 4.1  | 2.3   |
| 6 Muscle disorders                  | 2.6  | 3.5   | Pressure ulcer of skin                                             | 3.5  | 3.1   |
| 7 Neurocognitive disorders          | 2.5  | 1.7   | Anxiety and fear-related disorders                                 | 3.4  | 2.2   |
| 8 Heart failure                     | 2.5  | 2.9   | Diabetes mellitus with complication                                | 2.4  | 2.2   |
| 9 Nervous system signs and symptoms | 2.4  | 4.0   | Other general signs and symptoms                                   | 2.0  | 2.7   |
| 10 Other general signs and symptoms | 2.2  | 2.5   | Exposure, encounters, screening or contact with infectious disease | 1.8  | 1.0   |

TM – telemedicine visits; all – all (in person and telemedicine) visits. Diagnoses that were more frequent among telemedicine visit than all visits are highlighted in green.

**eTable 5.** Adjusted odds ratios of characteristics of SNFs in the top quartile by telemedicine use for SNF visits in 2020 and 2021

| Year                                                                                               | 2020              | 2021              |
|----------------------------------------------------------------------------------------------------|-------------------|-------------------|
| <b>N of SNFs in top quartile</b>                                                                   | 3,618             | 3,318             |
| Total N of SNFs                                                                                    | 14,484            | 13,517            |
| <b>Telemedicine visits in top quartile SNFs</b>                                                    |                   |                   |
| Minimum proportion                                                                                 | 14.6%             | 2.3%              |
| Median proportion                                                                                  | 27.3%             | 4.3%              |
| <b>Telemedicine visits in other SNFs</b>                                                           |                   |                   |
| Median proportion                                                                                  | 10.5%             | 0.4%              |
| <b>Likelihood of being in the top quartile vs other SNFs<br/>(Adjusted odds ratios and 95% CI)</b> |                   |                   |
| <b>Ownership</b>                                                                                   |                   |                   |
| For profit                                                                                         | Ref               | Ref               |
| Government                                                                                         | 0.87 (0.72, 1.04) | 0.90 (0.74, 1.09) |
| Not for profit                                                                                     | 0.98 (0.88, 1.09) | 0.97 (0.87, 1.08) |
| Part of chain                                                                                      | 0.93 (0.85, 1.02) | 1.01 (0.92, 1.11) |
| <b>Region</b>                                                                                      |                   |                   |
| South                                                                                              | Ref               | Ref               |
| Midwest                                                                                            | 1.46 (1.32, 1.60) | 1.46 (1.31, 1.62) |
| Northeast                                                                                          | 0.33 (0.28, 0.39) | 0.69 (0.60, 0.80) |
| West                                                                                               | 1.03 (0.90, 1.18) | 1.51 (1.31, 1.74) |
| <b>Geography<sup>a</sup></b>                                                                       |                   |                   |
| Metropolitan                                                                                       | ref               | ref               |
| Micropolitan                                                                                       | 1.62 (1.45, 1.81) | 2.20 (1.96, 2.46) |
| Small urban                                                                                        | 1.33 (1.17, 1.52) | 1.80 (1.58, 2.06) |
| Rural                                                                                              | 1.71 (1.47, 1.99) | 2.32 (1.98, 2.71) |
| <b>N of certified beds</b>                                                                         |                   |                   |
| ≤80                                                                                                | ref               | ref               |
| 81-120                                                                                             | 0.84 (0.76, 0.92) | 0.84 (0.76, 0.93) |
| ≥121                                                                                               | 0.68 (0.61, 0.76) | 0.71 (0.63, 0.79) |
| <b>Overall star rating<sup>b</sup></b>                                                             |                   |                   |
| 1-2                                                                                                | ref               | ref               |
| 3-4                                                                                                | 0.88 (0.80, 0.96) | 0.91 (0.82, 1.00) |
| 5                                                                                                  | 0.84 (0.75, 0.95) | 0.84 (0.74, 0.94) |
| <b>Nurse hours per resident day</b>                                                                |                   |                   |
| <1.3                                                                                               | ref               | ref               |
| 1.3-1.7                                                                                            | 0.82 (0.74, 0.90) | 0.91 (0.81, 1.01) |
| >1.7                                                                                               | 0.72 (0.64, 0.81) | 0.76 (0.67, 0.86) |
| <b>Residents on Medicaid<sup>c</sup></b>                                                           |                   |                   |
| ≤50%                                                                                               | ref               | ref               |
| 51-70%                                                                                             | 1.11 (0.99, 1.23) | 1.19 (1.07, 1.32) |
| ≥71%                                                                                               | 1.50 (1.34, 1.68) | 1.57 (1.40, 1.77) |
| <b>% resident race/ethnicity<sup>d</sup></b>                                                       |                   |                   |
| Black                                                                                              | 0.87 (0.84, 0.90) | 0.86 (0.83, 0.89) |
| White                                                                                              | -                 | -                 |
| Other                                                                                              | 0.97 (0.93, 1.02) | 1.06 (1.01, 1.11) |

SNF – skilled nursing facility. CI – confidence interval.

a - Area type is classified based on Rural-Urban Commuting Area Codes: metropolitan (1-3), micropolitan (4-6), small urban (7-9), or rural area (10).

b - Medicare star ratings range from 1 (much below average) to 5 (much above average). This score is a composite ranking of individual SNFs that incorporates multiple measures of SNF quality, staffing, and health inspection performance.

c - The proportion of Medicaid covered residents among all Medicare residents within the SNF.

d - The mean proportion of residents of specific race/ethnicity represent the proportion of unique Medicare beneficiaries residing in the SNFs of that group. Odds ratios are provided for the variable scaled by 10 (the odds of SNF being in a high telemedicine use group associated with 10 percentage points increase in the race/ethnicity among all Medicare residents). Other race/ethnicity includes Asian, Hispanic, North American native, other, and missing.

Included are SNFs that had at least 10 SNF visits for their residents in the analyzed year. Ownership, chain, beds, and rating information is from January 2020 (CMS Nursing Homes Compare). SNFs with missing information in CMS Nursing Homes Compare are excluded (N=832 in 2020; N=1789 in 2021).

**eTable 6.** Characteristics of SNF-visit-providing clinicians in the top decile by telemedicine use in 2020-2021

|                                             | Top decile       | Other clinicians  | Adjusted odds ratio |
|---------------------------------------------|------------------|-------------------|---------------------|
| N of clinicians                             | 5,233            | 47,100            |                     |
| N of total visits in the group              | 4,477,721        | 47,812,623        |                     |
| N of total telemedicine visits in the group | 1,844,057        | 825,663           |                     |
| N of telemedicine visits (mean, SD)         | 352.39 (717.15)  | 17.53 (74.05)     |                     |
| Clinician category                          |                  |                   |                     |
| Generalist medical doctor                   | 2,728 (52.1%)    | 19,782 (42.0%)    | ref                 |
| Specialist medical doctor                   | 570 (10.9%)      | 7,508 (15.9%)     | 0.56 (0.50, 0.62)   |
| Other practitioners                         | 1,935 (37%)      | 19,810 (42.1%)    | 0.71 (0.65, 0.78)   |
| Clinician gender: woman                     | 2,168 (50.6%)    | 18,575 (48.4%)    | 1.29 (1.19, 1.39)   |
| Year of graduation                          |                  |                   |                     |
| ≤1995                                       | 1,440 (33.6%)    | 12,959 (33.8%)    | ref                 |
| 1996-2010                                   | 1,540 (35.9%)    | 11,851 (30.9%)    | 1.14 (1.05, 1.24)   |
| ≥2011                                       | 1,304 (30.4%)    | 13,519 (35.3%)    | 0.88 (0.79, 0.97)   |
| Clinician geography                         |                  |                   |                     |
| Metropolitan                                | 2,850 (66.6%)    | 30,746 (80.2%)    | ref                 |
| Micropolitan                                | 732 (17.1%)      | 3,690 (9.6%)      | 2.13 (1.95, 2.34)   |
| Small town                                  | 463 (10.8%)      | 2,538 (6.6%)      | 1.84 (1.65, 2.06)   |
| Rural                                       | 237 (5.5%)       | 1,367 (3.6%)      | 1.80 (1.56, 2.08)   |
| N of SNF visits per clinician (mean, SD)    | 855.67 (1643.42) | 1,015.13 (1677.6) | 1.00 (0.99, 1.00)   |
| N of SNF patients per clinician (mean, SD)  | 179.05 (284.7)   | 188.03 (256.7)    | 0.99 (0.98, 0.99)   |
| N of SNFs per clinician (mean, SD)          | 14.79 (31.8)     | 10.22 (12.7)      | 1.03 (1.03, 1.04)   |

SNF – skilled nursing facility.

Clinicians in the top decile by telemedicine use had more than 18.6% of their SNF visits delivered in telemedicine. Only clinicians with at least 20 total SNF visits in 2020-2021 combined are included.

Gender was missing for 9,690 (18.5%), year of graduation for 9,720 (18.6%) and geography (ZIP area information) for 9,710 (18.6%) clinicians.

**eTable 7.** Characteristics of patients who received at least one telemedicine visit during their SNF stay in 2020-2021

|                                    | With telemedicine visit | No telemedicine visits | Adjusted odds ratio |
|------------------------------------|-------------------------|------------------------|---------------------|
| N                                  | 808,530 (25.5%)         | 2,367,988 (74.5%)      |                     |
| Female sex (%)                     | 493,322 (61.0%)         | 1,416,734 (59.8%)      | 0.96 (0.95, 0.96)   |
| Age (%)                            |                         |                        |                     |
| <65                                | 92,461 (11.4%)          | 195,819 (8.3%)         | 1.26 (1.24, 1.28)   |
| 65-74                              | 196,878 (24.4%)         | 548,725 (23.2%)        | ref                 |
| 75-84                              | 247,820 (30.7%)         | 766,148 (32.4%)        | 0.78 (0.78, 0.79)   |
| ≥85                                | 271,371 (33.6%)         | 857,296 (36.2%)        | 0.61 (0.60, 0.62)   |
| Race/ethnicity (%)                 |                         |                        |                     |
| Black                              | 92,668 (11.5%)          | 269,303 (11.4%)        | 0.91 (0.90, 0.93)   |
| White                              | 669,920 (82.9%)         | 1,967,871 (83.1%)      | Ref                 |
| Other                              | 45,942 (5.7%)           | 130,814 (5.5%)         | 0.93 (0.91, 0.94)   |
| Dual eligible in 2020 (%)          | 472,701 (58.5%)         | 893,344 (37.7%)        | 0.93 (0.92, 0.94)   |
| Reason for Medicare enrollment (%) |                         |                        |                     |
| Old age                            | 557,281 (68.9%)         | 1,792,254 (75.7%)      | Ref                 |
| Disability or renal failure        | 251,249 (31.1%)         | 575,734 (24.3%)        | 0.96 (0.95, 0.97)   |
| Long-term care (%)                 | 527,568 (65.3%)         | 977,165 (41.3%)        | 0.55 (0.55, 0.55)   |
| N of comorbidities (mean, SD)      | 11.3 (3.6)              | 10.8 (3.8)             | 1.07 (1.07, 1.07)   |
| Dementia (%)                       | 217,343 (26.9%)         | 463,666 (19.6%)        | 0.97 (0.97, 0.98)   |
| COVID-19 during SNF stay (%)       | 183,235 (22.7%)         | 208,722 (8.8%)         | 1.69 (1.67, 1.70)   |
| Limited mobility (%)               | 126,037 (18.4%)         | 346,123 (19.1%)        | 0.99 (0.98, 1.00)   |

SNF – skilled nursing facility. CI – confidence interval. SD – standard deviation.

Only residents with at least one SNF or outpatient visit during their stay were included. Model estimates are stratified by the state where SNF is located and adjusted for the length of stay at SNF with an offset (natural logarithm of total SNF stay duration in that year in days). Sociodemographic and comorbidity data was missing for 18,924 (0.6%) beneficiaries who were excluded from this table. Mobility information was missing for 585,364 (20.0%) beneficiaries. Missing mobility values were added as a separate category in the models (odds ratio not shown). Other race/ethnicity includes Asian, Hispanic, North American native, other, and missing.

**eFigure 3.** Proportion of visits delivered by telemedicine in four examined clinical care scenarios for long-term care residents in high- and low- telemedicine use SNFs in 2018-2021

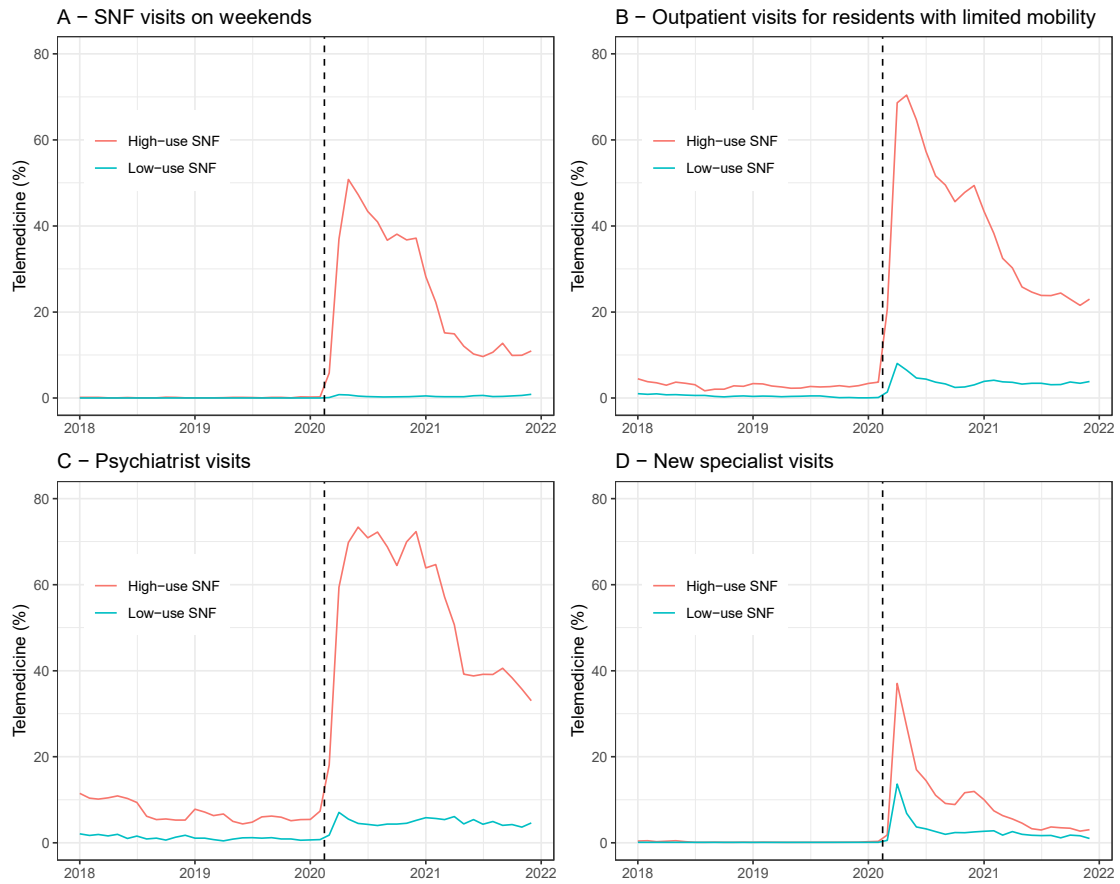

SNF – skilled nursing facility.

High-use SNFs were defined as those in the top quartile by telemedicine use in 2020 for SNF or outpatient visits (depending on the analyzed outcome), and low-use as those in the bottom quartile.

**eAppendix 2.** Testing of parallel trends for the outcomes before telemedicine expansion

To examine if the outcomes studied in the difference-in-differences analysis were evolving in parallel in 2018-2019 (before the expansion of telemedicine) in the groups of high and low telemedicine adopting SNFs, we implemented linear regression models:

$$Outcome_{iy} = \beta_0 + \beta_1 Year_y + \beta_2 SNF\_group_i + \beta_3 Year_y * SNF\_group_i + \beta_4 State_i + X_i\tau + \varepsilon_{iy}$$

$Outcome_{iy}$  is patient  $i$ 's outcome in year  $y$ ;

$\beta_0$  is a constant;

$Year_y$  is a linear variable for the year of the outcome;

$SNF\_group_i$  is a binary indicator of whether the patient stayed at a SNF with high telemedicine use in 2020;

$Year_y * SNF\_group_i$  is the interaction term capturing if the outcome trends in 2017-2019 in high and low telemedicine SNFs are not parallel;

$State_i$  is a fixed effect for the state where SNF is located;

$X_i\tau$  is the set of resident characteristics (indicators for sex, race, dual Medicaid eligibility, original reason for Medicare enrolment, presence of dementia, and continuous variables for the number of chronic conditions and age);

$\varepsilon_{iy}$  is the error with SNF level clustering.

As in the main models, we weighted observations by the length of stay at SNF in days

Table below presents the estimates for the interaction term.

| Patient group –<br>Visits per resident-year           | $\beta_3$ (95% confidence interval) | p-value |
|-------------------------------------------------------|-------------------------------------|---------|
| Residents on weekends:<br>SNF visits on weekends      | -0.36 (-0.64, -0.07)                | 0.014   |
| Residents with limited mobility:<br>Outpatient visits | -0.21 (-0.33, -0.09)                | 0.001   |
| All residents:<br>Outpatient psychiatrist visits      | -0.04 (-0.07, -0.01)                | 0.004   |
| All residents:<br>New outpatient specialist visits    | 0.00 (-0.01, 0.01)                  | 0.668   |

The estimated interaction term is not statistically significant for new outpatient consultations with specialist physicians, which can be interpreted as linear (parallel) trends for these outcomes in 2018-2019.

It is statistically significant for outpatient visits for residents with limited mobility, SNF visits on weekends, and psychiatrist visits: in 2018-2019, high telemedicine using SNFs were increasing the number of visits slower than low telemedicine using SNFs. The differential pre-trends could mean that these groups of SNFs were potentially different in relevant ways in respect to these outcomes even before the expansion of telemedicine.

**eAppendix 3.** Difference-in-differences in visit counts in 2018-2019 vs 2020-2021 in high vs low telemedicine adopting SNFs

The results, presented in the main manuscript, were built with linear regression models, in which observations were weighted by the length of stay at SNF in days (Model 1):

$$Outcome_{iy} = \beta_0 + \beta_1 Year_y + \beta_2 SNF\_group_i + \beta_3 Period_y * SNF\_group_i + \beta_4 State_i + X_i\tau + \varepsilon_{iy}$$

$Outcome_{iy}$  is patient  $i$ 's outcome in year  $y$ ;

$\beta_0$  is a constant;

$Year_y$  is a fixed effect for the year of the outcome;

$SNF\_group_i$  is a binary indicator of whether the patient stayed at a SNF with high telemedicine use in 2020;

$Period_y * SNF\_group_i$  is the interaction term equal to 1 in high telemedicine use SNFs in 2020-2021 and equal to 0 in low telemedicine use SNFs and earlier years;

$State_i$  is a fixed effect for the state where SNF is located;

$X_i\tau$  is the set of resident characteristics (indicators for sex, race, dual Medicaid eligibility, original reason for Medicare enrolment, presence of dementia, and continuous variables for the number of chronic conditions and age);

$\varepsilon_{iy}$  is the error with SNF level clustering.

The number of observations (resident-year combinations) for each model are provided below. Note that one observation reflects one resident-SNF-year pair (representing at least 60 days of SNF stay).

| Model                                                 | Number of resident-year observations |                            |
|-------------------------------------------------------|--------------------------------------|----------------------------|
|                                                       | Total                                | High telemedicine use SNFs |
| Residents on weekends:<br>SNF visits on weekends      | 1,736,708                            | 785,405                    |
| Residents with limited mobility:<br>Outpatient visits | 387,857                              | 174,133                    |
| All residents:<br>Outpatient psychiatrist visits      | 1,723,325                            | 804,598                    |
| All residents:<br>New outpatient specialist visits    | 1,723,325                            | 804,598                    |

Table 2 in the main manuscript presents estimates of the interaction term, corresponding to difference-in-differences estimate.



**eAppendix 4.** Difference-in-differences models with a separate term for 2020 and 2021

To explore if high-telemedicine use in 2020 was associated with different outcomes in year 2020 and year 2021, we implemented a model with separate terms for these years:

$$Outcome_{iy} = \beta_0 + \beta_1 Year_y + \beta_2 SNF\_group_i + \beta_3 Period_{2020} * SNF\_group_i + \beta_4 Period_{2021} * SNF\_group_i + \beta_5 State_i + X_i\tau + \varepsilon_{iy}$$

$Outcome_{iy}$  is patient  $i$ 's outcome in year  $y$ ;

$\beta_0$  is a constant;

$Year_y$  is a fixed effect for the year of the outcome;

$SNF\_group_i$  is a binary indicator of whether the patient stayed at a SNF with high telemedicine use in 2020;

$Period_{2020} * SNF\_group_i$  and  $Period_{2021} * SNF\_group_i$  are the interaction terms equal to 1 in high telemedicine use SNFs in 2020 and in 2021 respectively, and equal to 0 in low telemedicine use SNFs and other years;

$State_i$  is a fixed effect for the state where SNF is located;

$X_i\tau$  is the set of resident characteristics (indicators for sex, race, dual Medicaid eligibility, original reason for Medicare enrolment, presence of dementia, and continuous variables for the number of chronic conditions and age);

$\varepsilon_{iy}$  is the error with SNF level clustering.

The estimated interaction terms are provided in the table below:

| Patient group –<br>Visits per resident-year           | $\beta_3$ – effect in 2020             |         | $\beta_4$ – effect in 2021             |         |
|-------------------------------------------------------|----------------------------------------|---------|----------------------------------------|---------|
|                                                       | Estimates (95%<br>confidence interval) | p-value | Estimates (95%<br>confidence interval) | p-value |
| Residents on weekends:<br>SNF visits on weekends      | -0.86 (-1.27, -0.44)                   | 0.000   | -0.84 (-1.27, -0.40)                   | 0.000   |
| Residents with limited mobility:<br>Outpatient visits | 0.15 (-0.04, 0.34)                     | 0.116   | 0.21 (-0.01, 0.44)                     | 0.060   |
| All residents:<br>Outpatient psychiatrist visits      | 0.05 (0.02, 0.08)                      | 0.001   | 0.02 (-0.03, 0.06)                     | 0.477   |
| All residents:<br>New outpatient specialist visits    | -0.01 (-0.01, 0.00)                    | 0.015   | 0.00 (0.00, 0.01)                      | 0.227   |
