# Supplementary material for: Telemedicine Visits in US Skilled Nursing Facilities
Source: PubMed Central journal article supplement (PMC10439478; doi:10.1001/jamanetworkopen.2023.29895), 2023-08-18
Supplement: jamanetwopen-e2329895-s002.pdf [file jamanetwopen-e2329895-s002.pdf]

## Data Sharing Statement

Ulyte. Telemedicine Visits in US Skilled Nursing Facilities. *JAMA Netw Open*. Published August 18, 2023. doi:10.1001/jamanetworkopen.2023.29895

### Data

**Data available:** No

### Additional Information

**Explanation for why data not available:** Medicare claims data are available only to specific researchers under Data Use Agreement.
